# Supplementary material for: Impact of Mir196a-2 Genotypes on Colorectal Cancer Risk in Taiwan
Source: MDPI journal article supplement (doi:10.3390/ijms241411613), 2023-07-18
Supplement: s1 [file s1]

**Supplemental Table S1.** Correlation between *mir196a-2* rs11614913 genotype and epidemiological characteristics

| Index            | Subgroup  | Controls, n | <i>mir196a-2</i> rs11614913 genotype, n (%) |            |           | <i>p</i> -Value <sup>a</sup> |
|------------------|-----------|-------------|---------------------------------------------|------------|-----------|------------------------------|
|                  |           |             | TT                                          | CT         | CC        |                              |
| Age              | ≤60 Years | 95          | 32 (33.7)                                   | 48 (50.5)  | 15 (15.8) | 0.5498                       |
|                  | >60 Years | 267         | 85 (31.8)                                   | 126 (47.2) | 56 (21.0) |                              |
| Gender           | Male      | 203         | 69 (34.0)                                   | 94 (46.3)  | 40 (19.7) | 0.7051                       |
|                  | Female    | 159         | 48 (30.2)                                   | 80 (50.3)  | 31 (19.5) |                              |
| Cigarette smoker | Ever      | 278         | 91 (32.8)                                   | 133 (47.8) | 54 (19.4) | 0.9523                       |
|                  | Never     | 84          | 26 (31.0)                                   | 41 (48.8)  | 17 (20.2) |                              |
| Alcohol drinker  | Ever      | 311         | 99 (31.8)                                   | 150 (48.2) | 62 (20.0) | 0.8642                       |
|                  | Never     | 51          | 18 (35.3)                                   | 24 (47.1)  | 9 (17.6)  |                              |
| BMI              | <24       | 175         | 57 (32.6)                                   | 81 (46.3)  | 37 (21.1) | 0.7283                       |
|                  | ≥24       | 187         | 60 (32.1)                                   | 93 (49.7)  | 34 (18.2) |                              |

<sup>a</sup>Based on Fisher's exact test.

**Supplemental Table S2.** Variant (T) allele frequencies of mir196a-2 rs11614913 in different populations

| SNP        | Population                | Sample size<br>(Healthy controls) | Variant (T) allele<br>frequency |
|------------|---------------------------|-----------------------------------|---------------------------------|
| rs11614913 | European                  | 190002                            | 0.394                           |
|            | African                   | 41930                             | 0.188                           |
|            | Mexican                   | 10808                             | 0.411                           |
|            | European American         | 7164                              | 0.407                           |
|            | Central American          | 2450                              | 0.354                           |
|            | South American            | 1982                              | 0.363                           |
|            | South Asian               | 4984                              | 0.307                           |
|            | East Asian                | 3118                              | 0.548                           |
|            | Taiwanese (current study) | 362                               | 0.564                           |

Data were extracted from <https://www.ncbi.nlm.nih.gov/snp/>
